# Supplementary material for: In Vitro Propagation of the Blueberry ‘Blue Suede™’ (Vaccinium hybrid) in Semi-Solid Medium and Temporary Immersion Bioreactors
Source: MDPI journal article supplement (doi:10.3390/plants12152752), 2023-07-25
Supplement: s1 [file s1]

**Supplementary Table S1:** Medium compositions used for ‘Blue Suede™’ blueberry in vitro initiation, multiplication and rooting.

| Mineral        | Component (mg/L)                                    | WPM-B1&B2 | BM-D6   | BM-D9-R1,2,3 | MW-R1   | 1/2WPM-R1,2 | MS-R1   | 1/2MS-R1 | 1/4MS-R1 |
|----------------|-----------------------------------------------------|-----------|---------|--------------|---------|-------------|---------|----------|----------|
| Macro elements | NH <sub>4</sub> NO <sub>3</sub>                     | 400.00    | 550.00  | 550.00       | 1025.00 | 300.00      | 1650.00 | 825.00   | 412.50   |
|                | (NH <sub>4</sub> ) <sub>2</sub> SO <sub>4</sub>     | -         | 50.00   | 50.00        | -       | -           | -       | -        | -        |
|                | CaCl <sub>2</sub>                                   | 72.50     | -       | -            | 202.35  | 36.25       | 332.20  | 166.10   | 83.05    |
|                | Ca(NO <sub>3</sub> ) <sub>2</sub>                   | 386.00    | 410.00  | 410.00       | 193.00  | 193.00      | -       | -        | -        |
|                | MgSO <sub>4</sub> .7H <sub>2</sub> O                | 180.70    | 370.00  | 370.00       | 180.70  | 90.35       | 180.70  | 90.35    | 45.18    |
|                | KCl                                                 | -         | -       | -            | -       | -           | 1900.00 | 950.00   | 475.00   |
|                | KNO <sub>3</sub>                                    | -         | 330.00  | 330.00       | 950.00  | -           | 170.00  | 85.00    | 42.50    |
|                | KH <sub>2</sub> PO <sub>4</sub>                     | 170.00    | 220.00  | 220.00       | 170.00  | 85.00       | -       | -        | -        |
|                | K <sub>2</sub> SO <sub>4</sub>                      | 990.00    | 140.00  | 140.00       | 495.00  | 495.00      | -       | -        | -        |
|                | NaH <sub>2</sub> PO <sub>4</sub>                    | -         | 100.00  | 100.00       | -       | -           | -       | -        | -        |
|                | Calcium gluconate                                   | -         | 1300.00 | 1300.00      | -       | -           | -       | -        | -        |
| Micro elements | Na <sub>2</sub> -EDTA                               | 37.30     | 37.30   | 37.30        | 37.30   | 18.65       | 37.30   | 18.65    | 9.33     |
|                | FeSO <sub>4</sub> .7H <sub>2</sub> O                | 27.85     | -       | -            | 27.85   | 13.93       | 27.85   | 13.93    | 6.96     |
|                | H <sub>3</sub> BO <sub>3</sub>                      | 6.20      | 6.20    | 6.20         | 6.20    | 3.10        | 6.20    | 3.10     | 1.55     |
|                | CoCl <sub>2</sub> .6H <sub>2</sub> O                | -         | 0.03    | 0.03         | 0.01    | -           | 0.03    | 0.01     | 0.01     |
|                | CuSO <sub>4</sub> .5H <sub>2</sub> O                | 0.25      | 0.03    | 0.03         | 0.14    | 0.13        | 0.03    | 0.01     | 0.01     |
|                | MnSO <sub>4</sub> .H <sub>2</sub> O                 | 22.30     | 22.30   | 22.30        | 19.60   | 11.15       | 16.90   | 8.45     | 4.23     |
|                | Na <sub>2</sub> MoO <sub>4</sub> .2H <sub>2</sub> O | 0.25      | 0.25    | 0.25         | 0.25    | 0.13        | 0.25    | 0.13     | 0.06     |
|                | KI                                                  | -         | 0.83    | 0.83         | 0.42    | -           | 0.83    | 0.42     | 0.21     |
|                | ZnSO <sub>4</sub> .7H <sub>2</sub> O                | 8.60      | 8.60    | 8.60         | 8.60    | 4.30        | 8.60    | 4.30     | 2.15     |
| Vitamins       | Glycine                                             | 2.00      | 1.00    | 1.00         | 2.00    | 2.00        | 2.00    | 1.00     | 0.50     |
|                | Adenine hemisulphate                                | -         | 6.83    | 6.83         | -       | -           | -       | -        | -        |
|                | Casein hydrolysate                                  | -         | 40.00   | 40.00        | -       | -           | -       | -        | -        |
|                | Myo-inositol                                        | 100.00    | 100.00  | 100.00       | 100.00  | 100.00      | 100.00  | 50.00    | 25.00    |
|                | Nicotinic acid                                      | 0.50      | 0.40    | 0.40         | 0.50    | 0.50        | 0.50    | 0.25     | 0.13     |
|                | Pyridoxine HCl                                      | 0.50      | 0.40    | 0.40         | 0.50    | 0.50        | 0.50    | 0.25     | 0.13     |
|                | Thiamine HCl                                        | 0.10      | 0.60    | 0.60         | 0.10    | 0.10        | 0.10    | 0.05     | 0.03     |
